# Supplementary material for: Vitamin D Supplementation and Disease-Free Survival in Stage II Melanoma: A Randomized Placebo Controlled Trial
Source: MDPI journal article supplement (doi:10.3390/nu13061931), 2021-06-04
Supplement: s1 [file s1]

**Supplemental Table S1. Centers involved in the study and number of patients recruited.**

| CENTERS                                           | TOTAL<br>N, %     |
|---------------------------------------------------|-------------------|
| Istituto Europeo di Oncologia - Milano            | 58 (56%)          |
| Azienda Ospedaliera Papa Giovanni XXIII - Bergamo | 23 (22%)          |
| A. O. U. "S. Maria della Misericordia" - Udine    | 13 (13%)          |
| I.R.C.C.S. A.O.U. San Martino – IST di Genova     | 8 (7%)            |
| P.O.S. Antonio Abate – A.S.P. Trapani - Erice     | 1 (1%)            |
| P. O. Antonio Perrino – Brindisi                  | 1 (1%)            |
| <b>TOTALE</b>                                     | <b>104 (100%)</b> |

**Supplemental Table S2. Multivariate Cox proportional hazard model for Disease free Survival.**

|                                                           | HR   | Low 95%CI | Up 95%CI | P-value  |
|-----------------------------------------------------------|------|-----------|----------|----------|
| Age                                                       | 1.04 | 0.98      | 1.09     | 0.19     |
| Arm Placebo vs Vitamin D                                  | 0.73 | 0.22      | 2.46     | 0.62     |
| VD low and Breslow $\geq$ 3 vs (VD high or Breslow $<$ 3) | 5.19 | 1.53      | 17.57    | 0.01     |
| Ulceration yes vs no                                      | 1.10 | 0.36      | 3.39     | 0.87     |
| Age                                                       | 1.03 | 0.98      | 1.08     | 0.25     |
| Arm Placebo vs Vitamin D                                  | 0.83 | 0.25      | 2.71     | 0.75     |
| VD low and Breslow $\geq$ 3 vs (VD high or Breslow $<$ 3) | 6.03 | 1.80      | 20.26    | $<0.001$ |
| N. mitosis $>2$ vs $\leq 2$                               | 3.87 | 0.46      | 32.53    | 0.21     |

**Supplemental Table S3. Vitamin D polymorphisms, minor allele frequency (MAF).**

| Ref Seq                   | MAF S480 | MAF HapMap CEU | Genotype frequencies |         |         |
|---------------------------|----------|----------------|----------------------|---------|---------|
| rs1544410; VDR BsmI, C/T* | T (0.46) | 0.44           | 30 (CC)              | 49 (CT) | 22 (TT) |
| rs731236; VDR TaqI, A/G   | G (0.45) | 0.44           | 32 (AA)              | 47 (AG) | 22 (GG) |
| rs7975232; VDR ApaI, A/C  | C (0.41) | 0.43           | 33 (AA)              | 55 (AC) | 13 (CC) |
| rs2228570; VDR FokI, A/G  | A (0.40) | 0.41           | 37 (GG)              | 48 (GA) | 16 (AA) |
| rs4588; G/T               | T (0.27) | 0.27           | 50 (GG)              | 43 (GT) | 8 (TT)  |
| rs7041; A/C               | A (0.41) | 0.42           | 33 (CC)              | 46 (CA) | 22 (AA) |
| rs2282679; G/T            | G (0.26) | 0.26           | 51 (TT)              | 42 (TG) | 8 (GG)  |
| rs6013897; CYP24A1, T/A   | A (0.24) | 0.26           | 55 (TT)              | 40 (TA) | 6 (AA)  |
| rs10877012; CYP27B1, G/T  | T (0.27) | 0.33           | 56 (GG)              | 35 (GT) | 10 (TT) |
| rs10741657; CYP2R1, A/G   | A (0.28) | 0.38           | 59 (GG)              | 33 (GA) | 9 (AA)  |

\*C=b and T=B according to restriction fragmentation genotyping with BsmI.

**Supplemental Table S4. GC polymorphisms and 25OHD serum levels (ng/mL).**

|                                                                    | 25OHD Median (IQ range)<br>Major allele homozygote genotype | 25OHD Median (IQ range)<br>Alternative genotypes |
|--------------------------------------------------------------------|-------------------------------------------------------------|--------------------------------------------------|
| rs2282679 TT (n=51) vs rs2282679 GG/GT (n=50)                      | 22.0 (15.4-25.9)                                            | 15.0 (11.9-20.0)                                 |
| rs4588 GG (n=50) vs rs4588 GT/TT (n=51)                            | 21.8 (15.2-25.9)                                            | 15.0 (12.0-21.0)                                 |
| rs7041 CC (n=33) vs rs7041 AA/AC (n=68)                            | 21.6 (14.4-25.4)                                            | 16.9 (12.1-23.4)                                 |
| Major allele haplotype (n=33) vs no major allele haplotypes (n=50) | 21.6 (14.4- 25.4)                                           | 15.0 (11.9-20.0)                                 |
